# Supplementary material
Source: publisher figshare collection journal article supplement (https://gsajournals.figshare.com/ndownloader/files/12981248)
Supplement: Supplementary file 1 [file 12981248]

**Legends**

**Figure S1: CED-1 is in asymmetric contact with QL.p.**

1. Individual image planes along the lateral-medial axis showing the localization of CED-1∆C::GFP around QL.p. QL.p was labelled with the transgene P*egl‐17mCherry::his‐24,* P*egl‐17myristoylated mCherry,* P*egl‐17mig‐10::yfp* (*rdvIs1*) and hyp 7 with the transgene P*ced-1ced-1∆C::gfp* (*enIs1*)(see ‘Materials and Methods’ for details). Images were acquired as explained for Fig. 3. It can be seen in the images for slices 8 and 9 that CED-1∆C::GFP is in contact with the posterior part of QL.p (white arrowheads) but not with its anterior part (blue arrowheads). A: Anterior, P: Posterior, D: Dorsal, V: Ventral. Scale bar: 2 µm. (B-C) Maximum-intensity Z-projections generated using image planes shown in Fig. S1A (B) and in Fig. 3 (C). Scale bar: 2 µm. White arrowheads indicate contact between CED-1∆C::GFP and QL.p, whereas blue arrowheads indicate the lack of contact.
